# Supplementary material
Source: PubMed Central journal article supplement (PMC4372064)

## SUPPORTING INFORMATION

### **Chimeric Agents Derived from the Functionalized Amino Acid, Lacosamide, and $\alpha$ -AminoAmide, Safinamide: Evaluation of their Inhibitory Actions on Voltage-gated Sodium Channels, and Antiseizure and Anti-nociception Activities and Comparison with Lacosamide and Safinamide**

Ki Duk Park,<sup>1,a</sup> Xiao-Fang Yang,<sup>2</sup> Erik T. Dustrude,<sup>3</sup> Yuying Wang,<sup>2</sup> Matthew S. Ripsch,<sup>4</sup> Fletcher A. White,<sup>4</sup> Rajesh Khanna,<sup>2,\*</sup> and Harold Kohn<sup>1,5,6,\*</sup>

From the <sup>1</sup>Division of Chemical Biology and Medicinal Chemistry, UNC Eshelman School of Pharmacy and the <sup>6</sup>Department of Chemistry, University of North Carolina, Chapel Hill, NC 27599, United States

<sup>2</sup>Department of Pharmacology, College of Medicine, University of Arizona, Tucson, Arizona 85742, United States

<sup>3</sup>Program in Medical Neuroscience, Paul and Carole Stark Neurosciences Research Institute,

<sup>4</sup>Department of Anesthesia, Indiana University School of Medicine, Indianapolis, IN 46202

<sup>5</sup>NeuroGate Therapeutics, Inc., 150 Fayetteville Street, Suite 2300, Raleigh, NC 27601

\*Corresponding authors

**Table S1.** Elemental Analyses for New Compounds

| <b>Cmpd</b>             | <b>Molecular Formula</b>                                                     | <b>Calculated (%)</b>                | <b>Found (%)</b>                     |
|-------------------------|------------------------------------------------------------------------------|--------------------------------------|--------------------------------------|
| ( <i>R</i> )- <b>7</b>  | C <sub>20</sub> H <sub>23</sub> ClN <sub>2</sub> O <sub>4</sub>              | C, 61.46; H, 5.93; Cl, 9.07; N, 7.17 | C, 61.55; H, 5.97; Cl, 8.89; N, 7.17 |
| ( <i>R</i> )- <b>8</b>  | C <sub>20</sub> H <sub>23</sub> ClN <sub>2</sub> O <sub>4</sub>              | C, 61.46; H, 5.93; Cl, 9.07; N, 7.17 | C, 61.75; H, 5.86; Cl, 9.15; N, 7.11 |
| ( <i>R</i> )- <b>9</b>  | C <sub>21</sub> H <sub>23</sub> F <sub>3</sub> N <sub>2</sub> O <sub>5</sub> | C, 57.27; H, 5.26; F, 12.94; N, 6.36 | C, 57.08; H, 5.20; F, 12.88; N, 6.30 |
| ( <i>R</i> )- <b>10</b> | C <sub>21</sub> H <sub>23</sub> F <sub>3</sub> N <sub>2</sub> O <sub>5</sub> | C, 57.27; H, 5.26; F, 12.94; N, 6.36 | C, 57.35; H, 5.28; F, 12.78; N, 6.38 |
| ( <i>R</i> )- <b>25</b> | C <sub>22</sub> H <sub>27</sub> ClN <sub>2</sub> O <sub>5</sub>              | C, 60.76; H, 6.26; Cl, 8.15; N, 6.44 | C, 60.79; H, 6.29; Cl, 7.98; N, 6.40 |
| ( <i>R</i> )- <b>26</b> | C <sub>22</sub> H <sub>27</sub> ClN <sub>2</sub> O <sub>5</sub>              | C, 60.76; H, 6.26; Cl, 8.15; N, 6.44 | C, 60.85; H, 6.31; Cl, 8.06; N, 6.40 |
| ( <i>R</i> )- <b>27</b> | C <sub>23</sub> H <sub>27</sub> F <sub>3</sub> N <sub>2</sub> O <sub>6</sub> | C, 57.02; H, 5.62; F, 11.76; N, 5.78 | C, 57.06; H, 5.61; F, 11.65; N, 5.75 |
| ( <i>R</i> )- <b>28</b> | C <sub>23</sub> H <sub>27</sub> F <sub>3</sub> N <sub>2</sub> O <sub>6</sub> | C, 57.02; H, 5.62; F, 11.76; N, 5.78 | C, 57.10; H, 5.68; F, 11.63; N, 5.76 |
| ( <i>R</i> )- <b>29</b> | C <sub>23</sub> H <sub>29</sub> ClN <sub>2</sub> O <sub>5</sub>              | C, 61.53; H, 6.51; Cl, 7.90; N, 6.24 | C, 61.67; H, 6.57; Cl, 7.73; N, 6.32 |
| ( <i>R</i> )- <b>30</b> | C <sub>23</sub> H <sub>29</sub> ClN <sub>2</sub> O <sub>5</sub>              | C, 61.53; H, 6.51; Cl, 7.90; N, 6.24 | C, 61.26; H, 6.47; Cl, 7.80; N, 6.17 |
| ( <i>R</i> )- <b>31</b> | C <sub>24</sub> H <sub>29</sub> F <sub>3</sub> N <sub>2</sub> O <sub>6</sub> | C, 57.83; H, 5.86; F, 11.43; N, 5.62 | C, 57.74; H, 5.92; F, 11.18; N, 5.58 |
| ( <i>R</i> )- <b>32</b> | C <sub>24</sub> H <sub>29</sub> F <sub>3</sub> N <sub>2</sub> O <sub>6</sub> | C, 57.83; H, 5.86; F, 11.43; N, 5.62 | C, 58.00; H, 5.95; F, 11.32; N, 5.56 |

**Table S2.** High Mass Spectrometry (ESI<sup>+</sup>)

| <b>Cmpd</b>     | <b>Molecular Formula</b>                                       | <b>Found</b>                   | <b>Calculated</b> |
|-----------------|----------------------------------------------------------------|--------------------------------|-------------------|
| ( <i>R</i> )-16 | C <sub>14</sub> H <sub>10</sub> ClNO                           | 266.0357 [M + Na] <sup>+</sup> | 266.0349          |
| ( <i>R</i> )-17 | C <sub>14</sub> H <sub>10</sub> ClNO                           | Not observed                   | 266.0349          |
| ( <i>R</i> )-18 | C <sub>15</sub> H <sub>10</sub> F <sub>3</sub> NO <sub>2</sub> | 316.0573 [M + Na] <sup>+</sup> | 316.0561          |
| ( <i>R</i> )-19 | C <sub>15</sub> H <sub>10</sub> F <sub>3</sub> NO <sub>2</sub> | 316.0549 [M + Na] <sup>+</sup> | 316.0561          |
| ( <i>R</i> )-20 | C <sub>14</sub> H <sub>14</sub> ClNO                           | 270.0666 [M + Na] <sup>+</sup> | 270.0662          |
| ( <i>R</i> )-21 | C <sub>14</sub> H <sub>14</sub> ClNO                           | 248.0863 [M + H] <sup>+</sup>  | 248.0842          |
| ( <i>R</i> )-22 | C <sub>15</sub> H <sub>14</sub> F <sub>3</sub> NO <sub>2</sub> | 298.1070 [M + H] <sup>+</sup>  | 298.1055          |
| ( <i>R</i> )-23 | C <sub>15</sub> H <sub>14</sub> F <sub>3</sub> NO <sub>2</sub> | 298.1034 [M + H] <sup>+</sup>  | 298.1055          |

## EXPERIMENTAL SECTION

**General Methods.** Melting points were determined in open capillary tubes using a Thomas-Hoover melting point apparatus and are uncorrected. Infrared spectra (IR) were run on an ATI Mattson Genesis FT-IR spectrometer. Absorption values are expressed in wavenumbers ( $\text{cm}^{-1}$ ). Optical rotations were obtained on a Jasco P-1030 polarimeter at the sodium D line (589 nm) using a 1 dm path length cell. NMR spectra were obtained at 400 MHz ( $^1\text{H}$ ) and 100 MHz ( $^{13}\text{C}$ ) using TMS as an internal standard. Chemical shifts ( $\delta$ ) are reported in parts per million (ppm) from tetramethylsilane. Low-resolution mass spectra were obtained with a BioToF-II-Bruker Daltonics spectrometer by Dr. S. Habibi at the University of North Carolina Department of Chemistry. The high-resolution mass spectrum was performed on a Bruker Apex-Q 12 Telsa FTICR spectrometer by Dr. S. Habibi. Microanalyses were performed by Atlantic Microlab, Inc. (Norcross, GA). Reactions were monitored by analytical thin-layer chromatography (TLC) plates (Aldrich, Cat # Z12272-6) and analyzed with 254 nm light. The reactions were purified by flash column chromatography using silica gel (Dynamic Adsorbents Inc., Cat # 02826-25). All chemicals and solvents were reagent grade and used as obtained from commercial sources without further purification. Yields reported are for purified products and were not optimized. Compounds were checked by TLC,  $^1\text{H}$  and  $^{13}\text{C}$  NMR, MS, and elemental analyses. The analytical results are within  $\pm 0.40\%$  of the theoretical value. The TLC, NMR and the analytical data confirmed the purity of the products was  $\geq 95\%$ .

### Scheme 1. Synthesis of (*R*)-7 - (*R*)-10

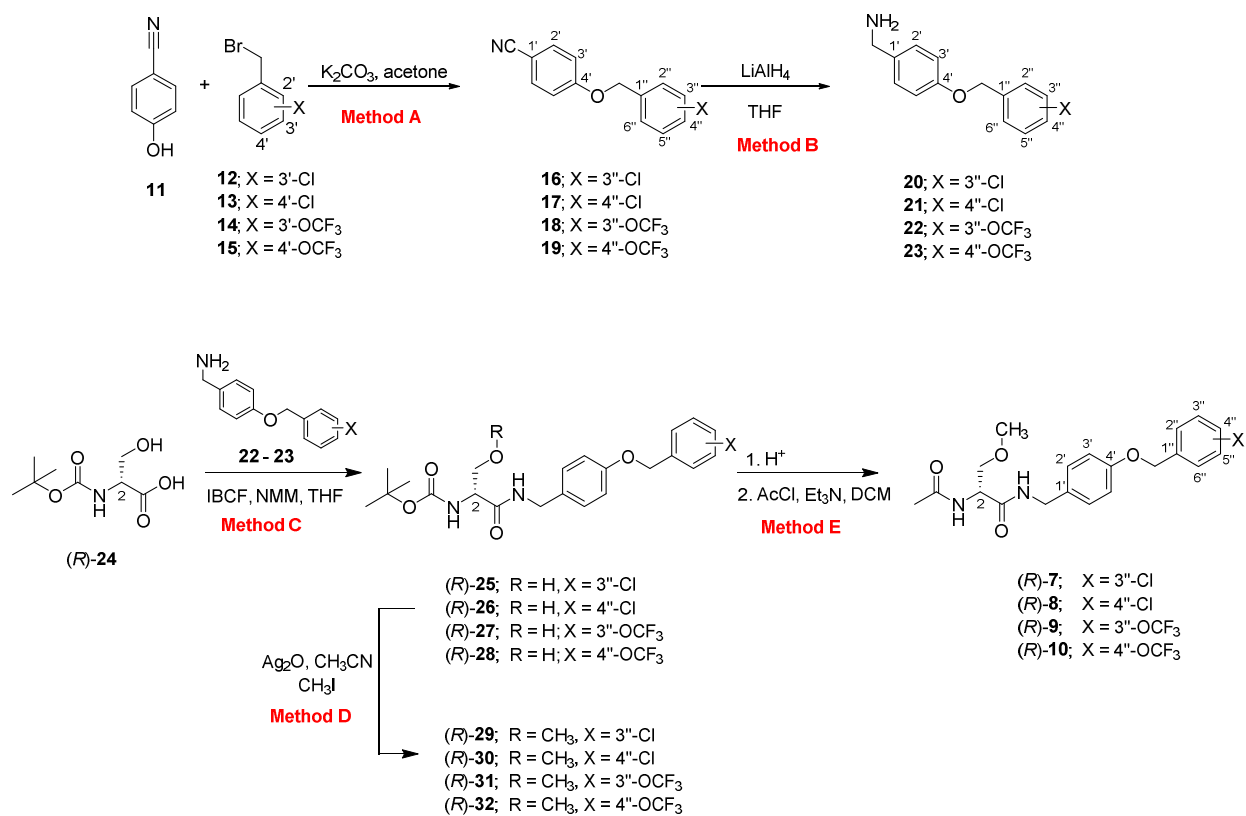

### General Procedure for the Preparation of 4-(Benzyloxy)benzonitrile Derivatives (Method A). A

mixture of the desired benzylbromide (5–10 g), 4-cyanophenol (**11**) (1.0–1.2 equiv) and K<sub>2</sub>CO<sub>3</sub> (4.0 equiv) was heated in acetone (200–400 mL) at reflux (5 h). The volatiles were evaporated and the residue was diluted in CH<sub>2</sub>Cl<sub>2</sub> (300 mL), and then washed with H<sub>2</sub>O (2×300 mL), dried (Na<sub>2</sub>SO<sub>4</sub>), and concentrated in vacuo to give the product as either a white solid or clear oil that was used without further purification.

### General Procedure for the Preparation (4-(Benzyloxy)phenyl)methanamine Derivatives

**(Method B)**. A THF (30 mL) solution of the 4-(benzyloxy)benzonitrile derivative (5–10 g) was

added dropwise to a LiAlH<sub>4</sub> (3.0 equiv) suspension in THF (400 mL) at 0 °C. The mixture was stirred at room temperature (16 h) and H<sub>2</sub>O (4 mL) was added dropwise at 0 °C followed by an aqueous NaOH solution (2 mL, 15% w/w), and then H<sub>2</sub>O (4 mL). The mixture was stirred at room temperature (2 h), and the precipitate filtered over a Celite<sup>®</sup> pad and washed with either CH<sub>2</sub>Cl<sub>2</sub> or EtOAc. The combined filtrates were concentrated in vacuo to obtain the desired product that was used without further purification.

**General Procedure for the Mixed Anhydride Coupling Reaction (Method C).** To a cooled anhydrous THF solution (−78 °C, dry ice acetone bath) of (*R*)-*t*-Boc-D-serine ((*R*)-**24**) ([C] ~ 0.1 M) were successively added *N*-methylmorpholine (NMM) (1.0–1.5 equiv), stirred for 2 min, isobutylchloroformate (IBCF) (1.1–1.3 equiv), stirred for 5 min, and then the desired benzylamine (1.0–1.2 equiv) in anhydrous THF. Upon addition the reaction mixture was allowed to warm to room temperature and further stirred (2–3 h). The salts were filtered over a Celite<sup>®</sup> pad and rinsed with THF and the filtrate was concentrated in vacuo. The residue obtained was purified by column chromatography on SiO<sub>2</sub> giving the desired product as a white solid.

**General Procedure for the Preparation of (*R*)-Substituted *N*-Benzyl 2-*N*-(*tert*-butoxycarbonyl)amino-3-methoxypropionamide Derivatives (Method D).** To a CH<sub>3</sub>CN solution of the 2-*N*-(*tert*-butoxycarbonyl)amino-3-hydroxypropionamide derivative ([C] ~0.05–0.5 M) was successively added Ag<sub>2</sub>O (5 equiv) and MeI (10 equiv) at room temperature. The reaction mixture was vigorously stirred at room temperature (2–3 d) under Ar while kept in the dark and then filtered through Celite<sup>®</sup> pad and the filtrate evaporated in vacuo. The residue was purified by column chromatography on SiO<sub>2</sub> to give the desired product.

**General Procedure for the Deprotection and Acetylation of (*R*)-Substituted *N*-Benzyl 2-*N*-(*tert*-Butoxycarbonyl)amino-3-methoxypropionamide Derivatives (Method E).** A CH<sub>2</sub>Cl<sub>2</sub> solution (0.1–0.3 M) of the *N*-(*tert*-butoxycarbonyl) compound was treated with 4 M HCl in dioxane (3–4 equiv) at room temperature (2–12 h). The reaction mixture was evaporated in vacuo. The resulting residue was dissolved in CH<sub>2</sub>Cl<sub>2</sub> (0.1–0.3 M) and then triethylamine (2–3 equiv) and acetyl chloride (1.0–1.2 equiv) were carefully added at 0 °C and the resulting solution was stirred at room temperature (2–16 h). The resulting solution was washed with an aqueous 10% citric acid solution followed by a saturated NaHCO<sub>3</sub> solution. The organic layer was dried (Na<sub>2</sub>SO<sub>4</sub>) and concentrated in vacuo. The residue was purified by column chromatography on SiO<sub>2</sub> and/or recrystallized with EtOAc/hexanes.

**Preparation of 4-(3'-Chlorobenzoyloxy)benzotrile<sup>1</sup> (16).** Using Method A, 3-(chloro)benzylbromide (**12**) (9.00 g, 43.8 mmol), 4-cyanophenol (**11**) (6.26 g, 52.6 mmol) and K<sub>2</sub>CO<sub>3</sub> (24.21 g, 175.2 mmol) gave **16** as a white solid (10.43 g, 98%): *R*<sub>f</sub> = 0.45 (hexanes/EtOAc 9/1); mp 88–89 °C (lit.<sup>1</sup> mp 91 °C); IR (nujol) 2927, 2860, 2215, 1596, 1462, 1376, 1297, 1247, 1092, 997, 906, 833, 728 cm<sup>-1</sup>; <sup>1</sup>H NMR (DMSO-*d*<sub>6</sub>) δ 5.23 (s, CH<sub>2</sub>O), 7.18–7.22 (m, 2 ArH), 7.42–7.54 (m, 4 ArH), 7.77–7.81 (m, 2 ArH); <sup>13</sup>C NMR (DMSO-*d*<sub>6</sub>) δ 68.7 (CH<sub>2</sub>O), 103.2, 115.8 (ArC), 119.0 (CN), 126.2, 127.4, 128.0, 130.4, 133.2, 134.2, 138.7, 161.5 (ArC); HRMS (ESI<sup>+</sup>) 266.0357 [M + Na]<sup>+</sup> (calcd for C<sub>14</sub>H<sub>10</sub>ClNONa<sup>+</sup> 266.0349).

**Preparation of 4-(4'-Chlorobenzoyloxy)benzotrile<sup>1</sup> (17).** Using Method A, 4-(chloro)benzylbromide (**13**) (10.00 g, 48.7 mmol), **11** (6.96 g, 58.4 mmol) and K<sub>2</sub>CO<sub>3</sub> (26.92 g, 194.8 mmol) gave **17** as a white solid (11.60 g, 98%): *R*<sub>f</sub> = 0.45 (hexanes/EtOAc 9/1); mp 99–100

°C (lit.<sup>1</sup> mp 101 °C); IR (nujol) 2923, 2865, 2212, 1587, 1469, 1368, 1282, 1102, 987, 838, 722 cm<sup>-1</sup>; <sup>1</sup>H NMR (DMSO-*d*<sub>6</sub>) δ 5.22 (s, CH<sub>2</sub>O), 7.19 (d, *J* = 8.4 Hz, 2 ArH), 7.42–7.56 (m, 4 ArH), 7.78 (d, *J* = 8.0 Hz, 2 ArH); <sup>13</sup>C NMR (DMSO-*d*<sub>6</sub>) δ 68.8 (CH<sub>2</sub>O), 103.2, 115.8 (ArC), 119.0 (CN), 128.5, 129.6, 132.7, 134.1, 135.1, 161.5 (ArC); HRMS (ESI<sup>+</sup>) no signal detected.

**Preparation of 4-(3'-Trifluoromethoxybenzyloxy)benzonitrile (18).** Using Method A, 3-(trifluoromethoxy)benzylbromide (**14**) (5.00 g, 19.6 mmol), **11** (2.80 g, 23.5 mmol) and K<sub>2</sub>CO<sub>3</sub> (10.84 g, 78.4 mmol) gave **18** as a clear oil (5.65 g, 98%): *R*<sub>f</sub> = 0.45 (hexanes/EtOAc 9/1); IR (nujol) 2927, 2854, 2216, 1598, 1463, 1384, 1252, 1175, 942, 841, 726 cm<sup>-1</sup>; <sup>1</sup>H NMR (DMSO-*d*<sub>6</sub>) δ 5.29 (s, CH<sub>2</sub>O), 7.21 (d, *J* = 8.8 Hz, 2 ArH), 7.35 (d, *J* = 7.6 Hz, 1 ArH), 7.48–7.58 (m, 3 ArH), 7.80 (d, *J* = 8.8 Hz, 2 ArH); <sup>13</sup>C NMR (DMSO-*d*<sub>6</sub>) δ 68.6 (CH<sub>2</sub>O), 103.3, 115.9 (ArC), 119.0 (CN), 120.1 (d, *J* = 254.9 Hz, OCF<sub>3</sub>), 120.1, 120.5, 126.7, 130.6, 134.2, 139.0, 148.5, 161.5 (ArC); HRMS (ESI<sup>+</sup>) 316.0573 [M + Na]<sup>+</sup> (calcd for C<sub>15</sub>H<sub>10</sub>F<sub>3</sub>NO<sub>2</sub>Na<sup>+</sup> 316.0561).

**Preparation of 4-(4'-Trifluoromethoxybenzyloxy)benzonitrile (19).** Using Method A, 4-(trifluoromethoxy)benzylbromide (**15**) (5.00 g, 19.6 mmol), **11** (2.80 g, 23.5 mmol) and K<sub>2</sub>CO<sub>3</sub> (10.84 g, 78.4 mmol) gave **19** as a white solid (5.49 g, 96%): *R*<sub>f</sub> = 0.45 (hexanes/EtOAc 9/1); mp 48–49 °C (lit.<sup>2</sup> mp 59–61 °C); IR (nujol) 2921, 2860, 2219, 1601, 1505, 1457, 1378, 1258, 1171, 1031, 923, 835, 716 cm<sup>-1</sup>; <sup>1</sup>H NMR (DMSO-*d*<sub>6</sub>) δ 5.26 (s, CH<sub>2</sub>O), 7.21 (d, *J* = 8.4 Hz, 2 ArH), 7.41 (d, *J* = 8.4 Hz, 2 ArH), 7.61 (d, *J* = 8.4 Hz, 2 ArH), 7.80 (d, *J* = 8.4 Hz, 2 ArH); <sup>13</sup>C NMR (DMSO-*d*<sub>6</sub>) δ 68.7 (CH<sub>2</sub>O), 103.2, 115.8 (ArC), 119.0 (CN), 120.1 (d, *J* = 254.2 Hz, OCF<sub>3</sub>), 121.1, 129.7, 134.2, 135.7, 148.0, 161.6 (ArC); HRMS (ESI<sup>+</sup>) 316.0549 [M + Na]<sup>+</sup> (calcd for C<sub>15</sub>H<sub>10</sub>F<sub>3</sub>NO<sub>2</sub>Na<sup>+</sup> 316.0561).



**Preparation of (4-(3'-Chlorobenzoyloxy)phenyl)methanamine (20).** Using Method B, 4-(3'-chlorobenzoyloxy)benzotrile (**16**) (10.00 g, 41.0 mmol) and LiAlH<sub>4</sub> (4.67 g, 123.1 mmol) gave **20** as a white solid (8.04 g, 79%): *R<sub>f</sub>* = 0.00 (hexanes/EtOAc 9/1); mp 55-56 °C; IR (nujol) 3355, 3262, 2919, 2860, 1605, 1510, 1464, 1378, 1299, 1241, 1173, 1075, 922, 839, 788 cm<sup>-1</sup>; <sup>1</sup>H NMR (DMSO-*d*<sub>6</sub>) δ 1.73 (br s, NH<sub>2</sub>), 3.65 (s, NH<sub>2</sub>CH<sub>2</sub>), 5.23 (s, CH<sub>2</sub>O), 6.94 (d, *J* = 8.4 Hz, 2 ArH), 7.24 (d, *J* = 8.4 Hz, 2 ArH), 7.36–7.50 (m, 4 ArH); <sup>13</sup>C NMR (DMSO-*d*<sub>6</sub>) δ 45.1 (NH<sub>2</sub>CH<sub>2</sub>), 68.2 (CH<sub>2</sub>O), 114.4, 126.0, 127.1, 127.6, 128.1, 130.3, 133.1, 136.8, 139.9, 156.5 (ArC); HRMS (ESI<sup>+</sup>) 270.0666 [M + Na]<sup>+</sup> (calcd for C<sub>14</sub>H<sub>14</sub>ClNONa<sup>+</sup> 270.0662).

**Preparation of (4-(4'-Chlorobenzoyloxy)phenyl)methanamine (21).** Using Method B, 4-(4'-chlorobenzoyloxy)benzotrile (**17**) (10.00 g, 41.0 mmol) and LiAlH<sub>4</sub> (4.67 g, 123.1 mmol) gave **21** as a white solid (9.88 g, 97%): *R<sub>f</sub>* = 0.00 (hexanes/EtOAc 9/1); mp 72-73 °C; IR (nujol) 3362, 3270, 2922, 2862, 1604, 1508, 1459, 1380, 1251, 1071, 928, 829, 776 cm<sup>-1</sup>; <sup>1</sup>H NMR (DMSO-*d*<sub>6</sub>) δ 1.84 (br s, NH<sub>2</sub>), 3.65 (s, NH<sub>2</sub>CH<sub>2</sub>), 5.07 (s, CH<sub>2</sub>O), 6.93 (d, *J* = 8.4 Hz, 2 ArH), 7.24 (d, *J* = 8.4 Hz, 2 ArH), 7.42–7.47 (m, 4 ArH); <sup>13</sup>C NMR (DMSO-*d*<sub>6</sub>) δ 45.1 (NH<sub>2</sub>CH<sub>2</sub>), 68.3 (CH<sub>2</sub>O), 114.4, 128.1, 128.4, 129.3, 132.3, 136.3, 136.7, 156.6 (ArC); HRMS (ESI<sup>+</sup>) 248.0863 [M + H]<sup>+</sup> (calcd for C<sub>14</sub>H<sub>14</sub>ClNOH<sup>+</sup> 248.0842).

**Preparation of (4-(3'-Trifluoromethoxybenzyloxy)phenyl)methanamine (22).** Using Method B, 4-(3'-trifluoromethoxybenzyloxy)benzotrile (**18**) (5.50 g, 18.8 mmol) and LiAlH<sub>4</sub> (2.14 g, 56.3 mmol) gave **22** as a clear oil (4.46 g, 80%): *R<sub>f</sub>* = 0.00 (hexanes/EtOAc 9/1); IR (nujol) 3357, 3281, 2932, 2858, 1603, 1511, 1467, 1239, 1165, 1032, 939, 837, 742 cm<sup>-1</sup>; <sup>1</sup>H NMR (DMSO-*d*<sub>6</sub>) δ 1.70 (br s, NH<sub>2</sub>), 3.64 (s, NH<sub>2</sub>CH<sub>2</sub>), 5.15 (s, CH<sub>2</sub>O), 6.95 (d, *J* = 8.2 Hz, 2 ArH), 7.24 (d, *J* = 8.2 Hz, 2 ArH),

7.31 (d,  $J = 7.6$  Hz, 1 ArH), 7.43–7.53 (m, 3 ArH);  $^{13}\text{C}$  NMR (DMSO- $d_6$ )  $\delta$  45.0 (NH<sub>2</sub>CH<sub>2</sub>), 68.2 (CH<sub>2</sub>O), 114.4, 119.7 (ArC), 120.1 (q,  $J = 254.9$  Hz, OCF<sub>3</sub>), 120.1, 126.4, 128.1, 130.4, 136.9, 140.2, 148.4, 156.5 (ArC); HRMS (ESI<sup>+</sup>) 298.1070 [M + H]<sup>+</sup> (calcd for C<sub>15</sub>H<sub>14</sub>F<sub>3</sub>NO<sub>2</sub>H<sup>+</sup> 298.1055).

**Preparation of (4-(4'-Trifluoromethoxybenzyloxy)phenyl)methanamine (23).** Using Method B, 4-(4'-trifluoromethoxybenzyloxy)benzotrile (19) (5.50 g, 18.8 mmol) and LiAlH<sub>4</sub> (2.14 g, 56.3 mmol) gave **23** as a white solid (4.52 g, 81%):  $R_f = 0.00$  (hexanes/EtOAc 9/1); mp 77-78 °C; IR (nujol) 3364, 3280, 2927, 2862, 1605, 1513, 1459, 1379, 1228, 1173, 1079, 1017, 924, 823, 754 cm<sup>-1</sup>;  $^1\text{H}$  NMR (DMSO- $d_6$ )  $\delta$  1.75 (br s, NH<sub>2</sub>), 3.64 (s, NH<sub>2</sub>CH<sub>2</sub>), 5.12 (s, CH<sub>2</sub>O), 6.94 (d,  $J = 8.8$  Hz, 2 ArH), 7.24 (d,  $J = 8.4$  Hz, 2 ArH), 7.38 (d,  $J = 8.8$  Hz, 2 ArH), 7.57 (d,  $J = 8.4$  Hz, 2 ArH);  $^{13}\text{C}$  NMR (DMSO- $d_6$ )  $\delta$  45.1 (NH<sub>2</sub>CH<sub>2</sub>), 68.2 (CH<sub>2</sub>O), 114.4 (ArC), 120.1 (q,  $J = 254.9$  Hz, OCF<sub>3</sub>), 120.1, 128.1, 129.4, 136.8, 136.8, 147.8, 156.6 (ArC); HRMS (ESI<sup>+</sup>) 298.1034 [M + H]<sup>+</sup> (calcd for C<sub>15</sub>H<sub>14</sub>F<sub>3</sub>NO<sub>2</sub>H<sup>+</sup> 298.1055).

**Preparation of (R)-N-4'-(3''-Chlorobenzyloxy)benzyl 2-N-(tert.-Butoxycarbonyl)amino-3-hydroxypropionamide ((R)-25).** Using Method C, **20** (7.24 g, 29.3 mmol), (R)-**24** (5.00 g, 24.4 mmol), NMM (4.02 mL, 36.6 mmol), and IBCF (4.02 mL, 30.7 mmol) gave (R)-**25** as a white solid (8.82 g, 83%):  $R_f = 0.40$  (hexanes/EtOAc 1/2); mp 83-84 °C;  $[\alpha]_D^{26} +16.5^\circ$  (c 1.3, CHCl<sub>3</sub>); IR (nujol) 3324, 2951, 2861, 1690, 1650, 1526, 1458, 1376, 1243, 1170, 1011, 778, 679 cm<sup>-1</sup>;  $^1\text{H}$  NMR (DMSO- $d_6$ )  $\delta$  1.39 (s, (CH<sub>3</sub>)<sub>3</sub>), 3.53-3.61 (br m, CH<sub>2</sub>OH), 3.98–4.02 (br m, CH), 4.17–4.29 (m, CH<sub>2</sub>N), 4.84 (t,  $J = 5.8$  Hz, OH), 5.11 (s, OCH<sub>2</sub>), 6.63 (d,  $J = 8.0$  Hz, NHCH), 6.93 (d,  $J = 8.8$  Hz, 2 ArH), 7.18 (d,  $J = 8.4$  Hz, 2 ArH), 7.36–7.49 (m, 4 ArH), 8.21–8.24 (br m, NHCH<sub>2</sub>);  $^{13}\text{C}$  NMR (DMSO- $d_6$ )  $\delta$  28.2 ((CH<sub>3</sub>)<sub>3</sub>), 41.7 (NCH<sub>2</sub>), 57.0 (OCH<sub>2</sub>CH), 61.9 (OCH<sub>2</sub>CH), 68.2 (OCH<sub>2</sub>), 78.2

(C(CH<sub>3</sub>)<sub>3</sub>), 114.5, 126.0, 127.1, 127.6, 128.3, 130.3, 131.8, 133.1, 139.8 (ArC), 155.2 (NC(O)O), 156.9 (ArC), 170.3 (C(O)); LRMS (ESI<sup>+</sup>) 435.1 [M + H]<sup>+</sup> (calcd for C<sub>22</sub>H<sub>27</sub>ClN<sub>2</sub>O<sub>5</sub>H<sup>+</sup> 435.1); Anal. Calcd. for C<sub>22</sub>H<sub>27</sub>ClN<sub>2</sub>O<sub>5</sub>: C, 60.76; H, 6.26; Cl, 8.15; N, 6.44. Found: C, 60.79; H, 6.29; Cl, 7.98; N, 6.40.

**Preparation of (R)-N-4'-(4"-Chlorobenzoyloxy)benzyl 2-N-(tert.-Butoxycarbonyl)amino-3-hydroxypropionamide ((R)-26).** Using Method C, **21** (4.36 g, 17.6 mmol), (*R*)-**24** (3.00 g, 14.7 mmol), NMM (2.42 mL, 22.0 mmol), and IBCF (2.42 mL, 18.6 mmol) gave (*R*)-**26** as a white solid (5.60 g, 88%): *R<sub>f</sub>* = 0.40 (hexanes/EtOAc 1/2); mp 119-121 °C; [α]<sub>D</sub><sup>26</sup> +16.4° (c 1.1, CHCl<sub>3</sub>); IR (nujol) 3319, 2938, 2859, 1656, 1538, 1466, 1347, 1241, 1173, 1009, 834, 769, 683 cm<sup>-1</sup>; <sup>1</sup>H NMR (DMSO-*d*<sub>6</sub>) δ 1.39 (s, (CH<sub>3</sub>)<sub>3</sub>), 3.57-3.62 (br m, CH<sub>2</sub>OH), 3.97-4.03 (br m, CH), 4.13-4.28 (m, CH<sub>2</sub>N), 4.83 (t, *J* = 5.6 Hz, OH), 5.09 (s, OCH<sub>2</sub>), 6.63 (d, *J* = 8.0 Hz, NHCH), 6.92 (d, *J* = 8.8 Hz, 2 ArH), 7.17 (d, *J* = 8.4 Hz, 2 ArH), 7.42-7.47 (m, 4 ArH), 8.20-8.24 (br m, NHCH<sub>2</sub>); <sup>13</sup>C NMR (DMSO-*d*<sub>6</sub>) δ 28.2 ((CH<sub>3</sub>)<sub>3</sub>), 41.5 (NCH<sub>2</sub>), 57.0 (OCH<sub>2</sub>CH), 61.9 (OCH<sub>2</sub>CH), 68.3 (OCH<sub>2</sub>), 78.2 (C(CH<sub>3</sub>)<sub>3</sub>), 114.5, 128.3, 128.4, 129.3, 131.7, 132.3, 136.3 (ArC), 155.2 (NC(O)O), 157.0 (ArC), 170.3 (C(O)); LRMS (ESI<sup>+</sup>) 435.2 [M + H]<sup>+</sup> (calcd for C<sub>22</sub>H<sub>27</sub>ClN<sub>2</sub>O<sub>5</sub>H<sup>+</sup> 435.2); Anal. Calcd. for C<sub>22</sub>H<sub>27</sub>ClN<sub>2</sub>O<sub>5</sub>: C, 60.76; H, 6.26; Cl, 8.15; N, 6.44. Found: C, 60.85; H, 6.31; Cl, 8.06; N, 6.40.

**Preparation of (R)-N-4'-(3"-Trifluoromethoxybenzyloxy)benzyl 2-N-(tert.-Butoxycarbonyl)amino-3-hydroxypropionamide ((R)-27).** Using Method C, **22** (4.40 g, 14.8 mmol), (*R*)-**24** (2.50 g, 12.2 mmol), NMM (2.01 mL, 18.3 mmol), and IBCF (2.01 mL, 15.5 mmol) gave (*R*)-**27** as a white solid (4.96 g, 83%): *R<sub>f</sub>* = 0.40 (hexanes/EtOAc 1/2); mp 97-98 °C; [α]<sub>D</sub><sup>26</sup> +16.8° (c 1.0, CHCl<sub>3</sub>); IR (nujol) 3326, 2945, 2866, 1691, 1645, 1537, 1455, 1378, 1289, 1174,

1029, 839, 734, 645  $\text{cm}^{-1}$ ;  $^1\text{H}$  NMR ( $\text{DMSO-}d_6$ )  $\delta$  1.39 (s,  $(\text{CH}_3)_3$ ), 3.57-3.63 (br m,  $\text{CH}_2\text{OH}$ ), 3.98-4.03 (br m,  $\text{CH}$ ), 4.18-4.30 (m,  $\text{CH}_2\text{N}$ ), 4.84 (t,  $J = 5.6$  Hz,  $\text{OH}$ ), 5.16 (s,  $\text{OCH}_2$ ), 6.64 (d,  $J = 8.0$  Hz,  $\text{NHCH}$ ), 6.95 (d,  $J = 8.0$  Hz, 2  $\text{ArH}$ ), 7.19 (d,  $J = 8.4$  Hz, 2  $\text{ArH}$ ), 7.31 (d,  $J = 7.6$  Hz, 1  $\text{ArH}$ ), 7.43-7.55 (m, 3  $\text{ArH}$ ), 8.21-8.25 (br m,  $\text{NHCH}_2$ );  $^{13}\text{C}$  NMR ( $\text{DMSO-}d_6$ )  $\delta$  28.1 ( $(\text{CH}_3)_3$ ), 41.5 ( $\text{NCH}_2$ ), 57.0 ( $\text{OCH}_2\text{CH}$ ), 61.9 ( $\text{OCH}_2\text{CH}$ ), 68.2 ( $\text{OCH}_2$ ), 78.2 ( $\text{C}(\text{CH}_3)_3$ ), 114.6, 118.8 ( $\text{ArC}$ ), 120.1 (q,  $J = 254.9$  Hz,  $\text{OCF}_3$ ), 120.1, 126.4, 128.3, 130.4, 131.9, 140.2, 148.5 ( $\text{ArC}$ ), 155.2 ( $\text{NC}(\text{O})\text{O}$ ), 156.9 ( $\text{ArC}$ ), 170.4 ( $\text{C}(\text{O})$ ); LRMS ( $\text{ESI}^+$ ) 485.2 [ $\text{M} + \text{H}$ ] $^+$  (calcd for  $\text{C}_{23}\text{H}_{27}\text{F}_3\text{N}_2\text{O}_6\text{H}^+$  485.2); Anal. Calcd. for  $\text{C}_{23}\text{H}_{27}\text{F}_3\text{N}_2\text{O}_6$ : C, 57.02; H, 5.62; F, 11.76; N, 5.78. Found: C, 57.06; H, 5.61; F, 11.65; N, 5.75.

**Preparation of (*R*)-*N*-4'-(4"-Trifluoromethoxybenzyloxy)benzyl 2-*N*-(*tert*-**

**Butoxycarbonyl)amino-3-hydroxypropionamide ((*R*)-**28**). Using Method C, **23** (4.15 g, 14.0 mmol), (*R*)-**24** (2.50 g, 12.2 mmol), NMM (2.01 mL, 18.3 mmol), and IBCF (2.01 mL, 15.5 mmol) gave (*R*)-**28** as a white solid (4.45 g, 75%):  $R_f = 0.40$  (hexanes/EtOAc 1/2); mp 96-97  $^\circ\text{C}$ ;  $[\alpha]_D^{26} +16.5^\circ$  (c 1.2,  $\text{CHCl}_3$ ); IR (nujol) 3339, 2912, 2861, 1684, 1639, 1524, 1457, 1377, 1294, 1242, 1169, 1046, 824, 721, 627  $\text{cm}^{-1}$ ;  $^1\text{H}$  NMR ( $\text{DMSO-}d_6$ )  $\delta$  1.39 (s,  $(\text{CH}_3)_3$ ), 3.56-3.61 (br m,  $\text{CH}_2\text{OH}$ ), 3.98-4.03 (br m,  $\text{CH}$ ), 4.17-4.29 (m,  $\text{CH}_2\text{N}$ ), 4.84 (t,  $J = 5.6$  Hz,  $\text{OH}$ ), 5.13 (s,  $\text{OCH}_2$ ), 6.63 (d,  $J = 8.0$  Hz,  $\text{NHCH}$ ), 6.94 (d,  $J = 8.4$  Hz, 2  $\text{ArH}$ ), 7.19 (d,  $J = 8.4$  Hz, 2  $\text{ArH}$ ), 7.37 (d,  $J = 8.4$  Hz, 2  $\text{ArH}$ ), 7.57 (d,  $J = 8.4$  Hz, 2  $\text{ArH}$ ), 8.21-8.25 (br m,  $\text{NHCH}_2$ );  $^{13}\text{C}$  NMR ( $\text{DMSO-}d_6$ )  $\delta$  28.1 ( $(\text{CH}_3)_3$ ), 41.5 ( $\text{NCH}_2$ ), 57.0 ( $\text{OCH}_2\text{CH}$ ), 61.9 ( $\text{OCH}_2\text{CH}$ ), 68.2 ( $\text{OCH}_2$ ), 78.2 ( $\text{C}(\text{CH}_3)_3$ ), 114.5 ( $\text{ArC}$ ), 120.1 (q,  $J = 254.9$  Hz,  $\text{OCF}_3$ ), 121.0, 128.3, 129.4, 131.8, 136.8, 147.8 ( $\text{ArC}$ ), 155.2 ( $\text{NC}(\text{O})\text{O}$ ), 157.0 ( $\text{ArC}$ ), 170.3 ( $\text{C}(\text{O})$ ); LRMS ( $\text{ESI}^+$ ) 485.2 [ $\text{M} + \text{H}$ ] $^+$  (calcd for  $\text{C}_{23}\text{H}_{27}\text{F}_3\text{N}_2\text{O}_6\text{H}^+$  485.2); Anal. Calcd. for  $\text{C}_{23}\text{H}_{27}\text{F}_3\text{N}_2\text{O}_6$ : C, 57.02; H, 5.62; F, 11.76; N, 5.78. Found: C, 57.10; H, 5.68; F, 11.63; N, 5.76.**

**Preparation of (*R*)-*N*-4'-(3''-Chlorobenzoyloxy)benzyl 2-*N*-(*tert*-Butoxycarbonyl)amino-3-methoxypropionamide ((*R*)-**29**).** Using Method D, (*R*)-**25** (8.60 g, 19.8 mmol), Ag<sub>2</sub>O (22.95 g, 99.0 mmol) and CH<sub>3</sub>I (12.36 mL, 198.1 mmol) gave (*R*)-**29** as a white solid (8.34 g, 94%): *R*<sub>f</sub> = 0.45 (hexanes/EtOAc 1/1); mp 110-111 °C; [α]<sub>D</sub><sup>26</sup> -16.1° (c 1.1, CHCl<sub>3</sub>); IR (nujol) 3310, 2950, 2856, 1646, 1527, 1457, 1375, 1247, 1169, 1091, 1049, 859, 777, 682 cm<sup>-1</sup>; <sup>1</sup>H NMR (DMSO-*d*<sub>6</sub>) δ 1.38 (s, (CH<sub>3</sub>)<sub>3</sub>), 3.23 (s, OCH<sub>3</sub>), 3.45-3.49 (br m, CH<sub>2</sub>OH), 4.15-4.27 (m, CH, CH<sub>2</sub>N), 5.11 (s, OCH<sub>2</sub>), 6.82 (d, *J* = 8.0 Hz, NHCH), 6.94 (d, *J* = 8.4 Hz, 2 ArH), 7.17 (d, *J* = 8.0 Hz, 2 ArH), 7.36-7.49 (m, 4 ArH), 8.33 (t, *J* = 5.8 Hz, NHCH<sub>2</sub>); <sup>13</sup>C NMR (DMSO-*d*<sub>6</sub>) δ 28.1 ((CH<sub>3</sub>)<sub>3</sub>), 41.5 (NCH<sub>2</sub>), 54.3 (OCH<sub>2</sub>CH), 58.1 (OCH<sub>3</sub>), 68.2 (OCH<sub>2</sub>), 72.0 (OCH<sub>2</sub>CH), 78.2 (C(CH<sub>3</sub>)<sub>3</sub>), 114.5, 126.0, 127.1, 127.6, 128.3, 130.3, 131.7, 133.1, 139.8 (ArC), 155.2 (NC(O)O), 156.9 (ArC), 169.8 (C(O)); LRMS (ESI<sup>+</sup>) 471.2 [M + Na]<sup>+</sup> (calcd for C<sub>23</sub>H<sub>29</sub>ClN<sub>2</sub>O<sub>5</sub>Na<sup>+</sup> 471.2); Anal. Calcd. for C<sub>23</sub>H<sub>29</sub>ClN<sub>2</sub>O<sub>5</sub>: C, 61.53; H, 6.51; Cl, 7.90; N, 6.24. Found: C, 61.67; H, 6.57; Cl, 7.73; N, 6.32.

**Preparation of (*R*)-*N*-4'-(4''-Chlorobenzoyloxy)benzyl 2-*N*-(*tert*-Butoxycarbonyl)amino-3-methoxypropionamide ((*R*)-**30**).** Using Method D, (*R*)-**26** (5.40 g, 12.4 mmol), Ag<sub>2</sub>O (14.41 g, 62.2 mmol) and CH<sub>3</sub>I (7.76 mL, 124.4 mmol) gave (*R*)-**30** as a white solid (5.14 g, 92%): *R*<sub>f</sub> = 0.45 (hexanes/EtOAc 1/1); mp 95-96 °C; [α]<sub>D</sub><sup>26</sup> -17.5° (c 1.0, CHCl<sub>3</sub>); IR (nujol) 3321, 2959, 2864, 1650, 1531, 1454, 1378, 1259, 1178, 1087, 934, 829, 754, 667 cm<sup>-1</sup>; <sup>1</sup>H NMR (DMSO-*d*<sub>6</sub>) δ 1.38 (s, (CH<sub>3</sub>)<sub>3</sub>), 3.23 (s, OCH<sub>3</sub>), 3.45-3.49 (br m, CH<sub>2</sub>OCH<sub>3</sub>), 4.15-4.26 (m, CH, CH<sub>2</sub>N), 5.08 (s, OCH<sub>2</sub>), 6.81 (d, *J* = 8.0 Hz, NHCH), 6.92 (d, *J* = 7.6 Hz, 2 ArH), 7.16 (d, *J* = 8.0 Hz, 2 ArH), 7.42-7.47 (m, 4 ArH), 8.32 (t, *J* = 5.8 Hz, NHCH<sub>2</sub>); <sup>13</sup>C NMR (DMSO-*d*<sub>6</sub>) δ 28.1 ((CH<sub>3</sub>)<sub>3</sub>), 41.5 (NCH<sub>2</sub>), 54.3 (OCH<sub>2</sub>CH), 58.1 (OCH<sub>3</sub>), 68.3 (OCH<sub>2</sub>), 72.0 (OCH<sub>2</sub>CH), 78.2 (C(CH<sub>3</sub>)<sub>3</sub>), 114.6, 128.3, 128.4, 129.3, 131.6, 132.3, 136.2 (ArC), 155.2 (NC(O)O), 157.0 (ArC), 169.8 (C(O)); LRMS (ESI<sup>+</sup>) 449.2 [M + H]<sup>+</sup> (calcd for

$C_{23}H_{29}ClN_2O_5H^+$  449.2); Anal. Calcd. for  $C_{23}H_{29}ClN_2O_5$ : C, 61.53; H, 6.51; Cl, 7.90; N, 6.24. Found: C, 61.26; H, 6.47; Cl, 7.80; N, 6.17.

**Preparation of (*R*)-*N*-4'-(3''-Trifluoromethoxybenzyloxy)benzyl 2-*N*-(*tert*-**

**Butoxycarbonyl)amino-3-methoxypropionamide ((*R*)-31).** Using Method D, (*R*)-27 (4.80 g, 9.9 mmol),  $Ag_2O$  (11.50 g, 49.6 mmol) and  $CH_3I$  (6.19 mL, 99.2 mmol) gave (*R*)-31 as a white solid (4.65 g, 94%):  $R_f = 0.45$  (hexanes/EtOAc 1/1); mp 84-86 °C;  $[\alpha]_D^{26} -15.3^\circ$  (c 1.1,  $CHCl_3$ ); IR (nujol) 3307, 2964, 2859, 1654, 1521, 1457, 1387, 1222, 1169, 1063, 872, 767, 691  $cm^{-1}$ ;  $^1H$  NMR ( $DMSO-d_6$ )  $\delta$  1.39 (s,  $(CH_3)_3$ ), 3.24 (s,  $OCH_3$ ), 3.47-3.51 (br m,  $CH_2OCH_3$ ), 4.16-4.28 (m, CH,  $CH_2N$ ), 5.16 (s,  $OCH_2$ ), 6.82 (d,  $J = 8.0$  Hz, NHCH), 6.95 (d,  $J = 7.6$  Hz, 2 ArH), 7.18 (d,  $J = 8.4$  Hz, 2 ArH), 7.31 (d,  $J = 8.0$  Hz, 1 ArH), 7.43-7.55 (m, 3 ArH), 8.34 (t,  $J = 5.8$  Hz, NHCH<sub>2</sub>);  $^{13}C$  NMR ( $DMSO-d_6$ )  $\delta$  28.1 ( $(CH_3)_3$ ), 41.5 (NCH<sub>2</sub>), 54.3 ( $OCH_2CH$ ), 58.1 ( $OCH_3$ ), 68.2 ( $OCH_2$ ), 72.0 ( $OCH_2CH$ ), 78.2 ( $C(CH_3)_3$ ), 114.6, 119.7 (ArC), 120.1 (q,  $J = 254.9$  Hz,  $OCF_3$ ), 120.1, 126.4, 128.3, 130.4, 131.8, 140.1, 148.5 (ArC), 155.2 (NC(O)O), 156.9 (ArC), 169.9 (C(O)); LRMS (ESI<sup>+</sup>) 449.3 [M + H]<sup>+</sup> (calcd for  $C_{24}H_{29}F_3N_2O_6H^+$  449.3); Anal. Calcd. for  $C_{24}H_{29}F_3N_2O_6$ : C, 57.83; H, 5.86; F, 11.43; N, 5.62. Found: C, 57.74; H, 5.92; F, 11.18; N, 5.58.

**Preparation of (*R*)-*N*-4'-(4''-Trifluoromethoxybenzyloxy)benzyl 2-*N*-(*tert*-**

**Butoxycarbonyl)amino-3-methoxypropionamide ((*R*)-32).** Using Method D, (*R*)-28 (4.30 g, 8.9 mmol),  $Ag_2O$  (10.29 g, 44.4 mmol) and  $CH_3I$  (5.54 mL, 88.8 mmol) gave (*R*)-32 as a white solid (3.84 g, 87%):  $R_f = 0.45$  (hexanes/EtOAc 1/1); mp 97-98 °C;  $[\alpha]_D^{26} -15.8^\circ$  (c 1.5,  $CHCl_3$ ); IR (nujol) 3322, 3027, 2928, 2846, 1658, 1519, 1442, 1378, 1235, 1178, 1079, 1054, 839, 747, 679  $cm^{-1}$ ;  $^1H$  NMR ( $DMSO-d_6$ )  $\delta$  1.38 (s,  $(CH_3)_3$ ), 3.23 (s,  $OCH_3$ ), 3.44-3.51 (br m,  $CH_2OCH_3$ ), 4.14-4.27 (m,

CH, CH<sub>2</sub>N), 5.13 (s, OCH<sub>2</sub>), 6.82 (d, *J* = 8.0 Hz, NHCH), 6.94 (d, *J* = 8.8 Hz, 2 ArH), 7.17 (d, *J* = 8.4 Hz, 2 ArH), 7.38 (d, *J* = 8.0 Hz, 2 ArH), 7.56 (d, *J* = 8.4 Hz, 2 ArH), 8.33 (t, *J* = 6.0 Hz, NHCH<sub>2</sub>); <sup>13</sup>C NMR (DMSO-*d*<sub>6</sub>) δ 28.1 ((CH<sub>3</sub>)<sub>3</sub>), 41.5 (NCH<sub>2</sub>), 54.3 (OCH<sub>2</sub>CH), 58.1 (OCH<sub>3</sub>), 68.2 (OCH<sub>2</sub>), 72.0 (OCH<sub>2</sub>CH), 78.2 (C(CH<sub>3</sub>)<sub>3</sub>), 114.5 (ArC), 120.1 (q, *J* = 254.9 Hz, OCF<sub>3</sub>), 121.0, 128.3, 129.4, 131.6, 136.7, 147.8 (ArC), 155.2 (NC(O)O), 157.0 (ArC), 169.8 (C(O)); LRMS (ESI<sup>+</sup>) 449.2 [M + H]<sup>+</sup> (calcd for C<sub>24</sub>H<sub>29</sub>F<sub>3</sub>N<sub>2</sub>O<sub>6</sub>H<sup>+</sup> 449.2); Anal. Calcd. for C<sub>24</sub>H<sub>29</sub>F<sub>3</sub>N<sub>2</sub>O<sub>6</sub>: C, 57.83; H, 5.86; F, 11.43; N, 5.62. Found: C, 58.00; H, 5.95; F, 11.32; N, 5.56.

#### Preparation of (*R*)-*N*-4'-(3''-Chlorobenzoyloxy)benzyl 2-Acetamido-3-methoxypropionamide

**((*R*)-7).** Using Method E, (*R*)-**29** (8.18 g, 18.26 mmol) and 4 M HCl (15.98 mL, 63.9 mmol), followed by Et<sub>3</sub>N (5.60 mL, 40.2 mmol) and AcCl (1.42 mL, 20.1 mmol) gave (*R*)-**7** as a white solid (5.86 g, 82%): *R<sub>f</sub>* = 0.40 (MeOH/CH<sub>2</sub>Cl<sub>2</sub> 1/20); mp 170-172 °C; [α]<sub>D</sub><sup>26</sup> -18.1° (c 1.2, CHCl<sub>3</sub>); IR (nujol) 3282, 3082, 2923, 2860, 1634, 1551, 1456, 1378, 1246, 1130, 1058, 980, 777, 716 cm<sup>-1</sup>; <sup>1</sup>H NMR (CDCl<sub>3</sub>) δ 2.00 (s, C(O)CH<sub>3</sub>), 3.35 (s, OCH<sub>3</sub>), 3.42–3.46 (m, CHH'OCH<sub>3</sub>), 3.77 (dd, *J* = 4.0, 9.0 Hz, CHH'OCH<sub>3</sub>), 4.32–4.43 (m, CH<sub>2</sub>N), 4.53–4.58 (m, CH), 5.01 (s, OCH<sub>2</sub>), 6.55 (d, *J* = 6.4 Hz, NHCH), 6.83–6.91 (m, 2 ArH, NHCH<sub>2</sub>), 7.18 (d, *J* = 8.4 Hz, 2 ArH), 7.26–7.42 (m, 4 ArH), addition of excess (*R*)-(-)-mandelic acid to a CDCl<sub>3</sub> solution of (*R*)-**7** gave only one signal for the acetyl methyl and one signal for the ether methyl protons; <sup>13</sup>C NMR (CDCl<sub>3</sub>) δ 23.4 (C(O)CH<sub>3</sub>), 43.2 (NCH<sub>2</sub>), 52.6 (OCH<sub>2</sub>CH), 59.2 (OCH<sub>3</sub>), 69.4 (OCH<sub>2</sub>), 72.0 (OCH<sub>2</sub>CH), 115.2, 125.5, 127.6, 128.3, 129.1, 130.1, 130.8, 134.7, 139.2, 158.0 (ArC), 170.1, 170.5 (2 C(O)); LRMS (ESI<sup>+</sup>) 413.2 [M + Na]<sup>+</sup> (calcd for C<sub>20</sub>H<sub>23</sub>ClN<sub>2</sub>O<sub>4</sub>Na<sup>+</sup> 413.2); Anal. Calcd. for C<sub>20</sub>H<sub>23</sub>ClN<sub>2</sub>O<sub>4</sub>: C, 61.46; H, 5.93; Cl, 9.07; N, 7.17. Found: C, 61.55; H, 5.97; Cl, 8.89; N, 7.17.

**Preparation of (*R*)-*N*-4'-(4''-Chlorobenzoyloxy)benzyl 2-Acetamido-3-methoxypropionamide**

**((*R*)-8).** Using Method E, (*R*)-**30** (4.80 g, 10.7 mmol) and 4 M HCl (9.38 mL, 37.5 mmol), followed by Et<sub>3</sub>N (3.28 mL, 23.5 mmol) and AcCl (0.83 mL, 11.8 mmol) gave (*R*)-**8** as a white solid (3.65 g, 87%): *R*<sub>f</sub> = 0.40 (MeOH/CH<sub>2</sub>Cl<sub>2</sub> 1/20); mp 180-181 °C; [ $\alpha$ ]<sub>D</sub><sup>26</sup> -17.9° (c 1.1, CHCl<sub>3</sub>); IR (nujol) 3280, 3103, 2924, 2859, 1635, 1553, 1458, 1375, 1240, 1098, 1047, 815, 727, 608 cm<sup>-1</sup>; <sup>1</sup>H NMR (CDCl<sub>3</sub>)  $\delta$  1.99 (s, C(O)CH<sub>3</sub>), 3.35 (s, OCH<sub>3</sub>), 3.42–3.46 (m, CHH'OCH<sub>3</sub>), 3.76 (dd, *J* = 4.0, 9.0 Hz, CHH'OCH<sub>3</sub>), 4.31–4.42 (m, CH<sub>2</sub>N), 4.54–4.59 (m, CH), 5.00 (s, OCH<sub>2</sub>), 6.58 (d, *J* = 6.4 Hz, NHCH), 6.85–6.92 (m, 2 ArH, NHCH<sub>2</sub>), 7.17 (d, *J* = 8.0 Hz, 2 ArH), 7.34 (s, 4 ArH), addition of excess (*R*)-(-)-mandelic acid to a CDCl<sub>3</sub> solution of (*R*)-**8** gave only one signal for the acetyl methyl and one signal for the ether methyl protons; <sup>13</sup>C NMR (CDCl<sub>3</sub>)  $\delta$  23.3 (C(O)CH<sub>3</sub>), 43.2 (NCH<sub>2</sub>), 52.6 (OCH<sub>2</sub>CH), 59.2 (OCH<sub>3</sub>), 69.4 (OCH<sub>2</sub>), 72.1 (OCH<sub>2</sub>CH), 115.2, 128.9, 128.9, 129.0, 130.7, 133.9, 135.6, 158.1 (ArC), 170.1, 170.5 (2 C(O)); LRMS (ESI<sup>+</sup>) 391.2 [M + H]<sup>+</sup> (calcd for C<sub>20</sub>H<sub>23</sub>ClN<sub>2</sub>O<sub>4</sub>H<sup>+</sup> 391.2); Anal. Calcd. for C<sub>20</sub>H<sub>23</sub>ClN<sub>2</sub>O<sub>4</sub>: C, 61.46; H, 5.93; Cl, 9.07; N, 7.17. Found: C, 61.75; H, 5.86; Cl, 9.15; N, 7.11.

**Preparation of (*R*)-*N*-4'-(3''-Trifluoromethoxybenzoyloxy)benzyl 2-Acetamido-3-**

**methoxypropionamide ((*R*)-9).** Using Method E, (*R*)-**31** (4.50 g, 9.0 mmol) and 4 M HCl (7.90 mL, 31.6 mmol), followed by Et<sub>3</sub>N (2.77 mL, 19.9 mmol) and AcCl (0.70 mL, 9.9 mmol) gave (*R*)-**9** as a white solid (3.50 g, 88%): *R*<sub>f</sub> = 0.40 (MeOH/CH<sub>2</sub>Cl<sub>2</sub> 1/20); mp 139-140 °C; [ $\alpha$ ]<sub>D</sub><sup>26</sup> -15.1° (c 1.0, CHCl<sub>3</sub>); IR (nujol) 3281, 3081, 2924, 2860, 1632, 1550, 1456, 1381, 1281, 1141, 1060, 974, 822, 710, 618 cm<sup>-1</sup>; <sup>1</sup>H NMR (CDCl<sub>3</sub>)  $\delta$  1.98 (s, C(O)CH<sub>3</sub>), 3.35 (s, OCH<sub>3</sub>), 3.43–3.47 (m, CHH'OCH<sub>3</sub>), 3.76 (dd, *J* = 4.0, 9.2 Hz, CHH'OCH<sub>3</sub>), 4.32–4.43 (m, CH<sub>2</sub>N), 4.56–4.61 (m, CH), 5.04 (s, OCH<sub>2</sub>), 6.63 (d, *J* = 6.8 Hz, NHCH), 6.89–6.97 (m, 2 ArH, NHCH<sub>2</sub>), 7.18 (d, *J* = 8.4 Hz, 2 ArH), 7.29–7.42 (m,



4 ArH), addition of excess (*R*)-(-)-mandelic acid to a CDCl<sub>3</sub> solution of (*R*)-**9** gave only one signal for the acetyl methyl and one signal for the ether methyl protons; <sup>13</sup>C NMR (CDCl<sub>3</sub>) δ 23.3 (C(O)CH<sub>3</sub>), 43.1 (NCH<sub>2</sub>), 52.7 (OCH<sub>2</sub>CH), 59.2 (OCH<sub>3</sub>), 69.2 (OCH<sub>2</sub>), 72.1 (OCH<sub>2</sub>CH), 115.2, 119.3, 120.4 (ArC), 120.6 (q, *J* = 256.4 Hz, OCF<sub>3</sub>), 125.6, 129.1, 130.1, 130.9, 139.5, 149.6, 158.0 (ArC), 170.1, 170.5 (2 C(O)); LRMS (ESI<sup>+</sup>) 441.1 [M + H]<sup>+</sup> (calcd for C<sub>21</sub>H<sub>23</sub>F<sub>3</sub>N<sub>2</sub>O<sub>5</sub>H<sup>+</sup> 441.1); Anal. Calcd. for C<sub>21</sub>H<sub>23</sub>F<sub>3</sub>N<sub>2</sub>O<sub>5</sub>: C, 57.27; H, 5.26; F, 12.94; N, 6.36. Found: C, 57.08; H, 5.20; F, 12.88; N, 6.30.

**Preparation of (*R*)-*N*-4'-(4"-Trifluoromethoxybenzyloxy)benzyl 2-Acetamido-3-**

**methoxypropionamide ((*R*)-**10**).** Using Method E, (*R*)-**32** (3.68 g, 7.4 mmol) and 4 M HCl (6.47 mL, 25.9 mmol), followed by Et<sub>3</sub>N (2.27 mL, 16.3 mmol) and AcCl (0.58 mL, 8.1 mmol) gave (*R*)-**10** as a white solid (3.10 g, 95%): *R<sub>f</sub>* = 0.40 (MeOH/CH<sub>2</sub>Cl<sub>2</sub> 1/20); mp 172-173 °C; [α]<sub>D</sub><sup>26</sup> -16.0° (c 1.1, CHCl<sub>3</sub>); IR (nujol) 3281, 3102, 2923, 2860, 1635, 1552, 1457, 1378, 1275, 1233, 1148, 1021, 835, 730, 609 cm<sup>-1</sup>; <sup>1</sup>H NMR (CDCl<sub>3</sub>) δ 1.99 (s, C(O)CH<sub>3</sub>), 3.35 (s, OCH<sub>3</sub>), 3.43–3.47 (m, CHH'OCH<sub>3</sub>), 3.76 (dd, *J* = 4.0, 9.2 Hz, CHH'OCH<sub>3</sub>), 4.32–4.43 (m, CH<sub>2</sub>N), 4.56–4.60 (m, CH), 5.03 (s, OCH<sub>2</sub>), 6.61 (d, *J* = 6.4 Hz, NHCH), 6.89–6.94 (m, 2 ArH, NHCH<sub>2</sub>), 7.18 (d, *J* = 8.4 Hz, 2 ArH), 7.22 (d, *J* = 8.4 Hz, 2 ArH), 7.44 (d, *J* = 8.4 Hz, 2 ArH), addition of excess (*R*)-(-)-mandelic acid to a CDCl<sub>3</sub> solution of (*R*)-**10** gave only one signal for the acetyl methyl and one signal for the ether methyl protons; <sup>13</sup>C NMR (CDCl<sub>3</sub>) δ 23.3 (C(O)CH<sub>3</sub>), 43.1 (NCH<sub>2</sub>), 52.7 (OCH<sub>2</sub>CH), 59.2 (OCH<sub>3</sub>), 69.3 (OCH<sub>2</sub>), 72.0 (OCH<sub>2</sub>CH), 115.1 (ArC), 120.6 (q, *J* = 255.7 Hz, OCF<sub>3</sub>), 121.3, 129.0, 129.1, 130.8, 135.8, 149.0, 158.1 (ArC), 170.1, 170.5 (2 C(O)); LRMS (ESI<sup>+</sup>) 441.1 [M + H]<sup>+</sup> (calcd for C<sub>21</sub>H<sub>23</sub>F<sub>3</sub>N<sub>2</sub>O<sub>5</sub>H<sup>+</sup> 441.1); Anal. Calcd. for C<sub>21</sub>H<sub>23</sub>F<sub>3</sub>N<sub>2</sub>O<sub>5</sub>: C, 57.27; H, 5.26; F, 12.94; N, 6.36. Found: C, 57.35; H, 5.28; F, 12.78; N, 6.38.

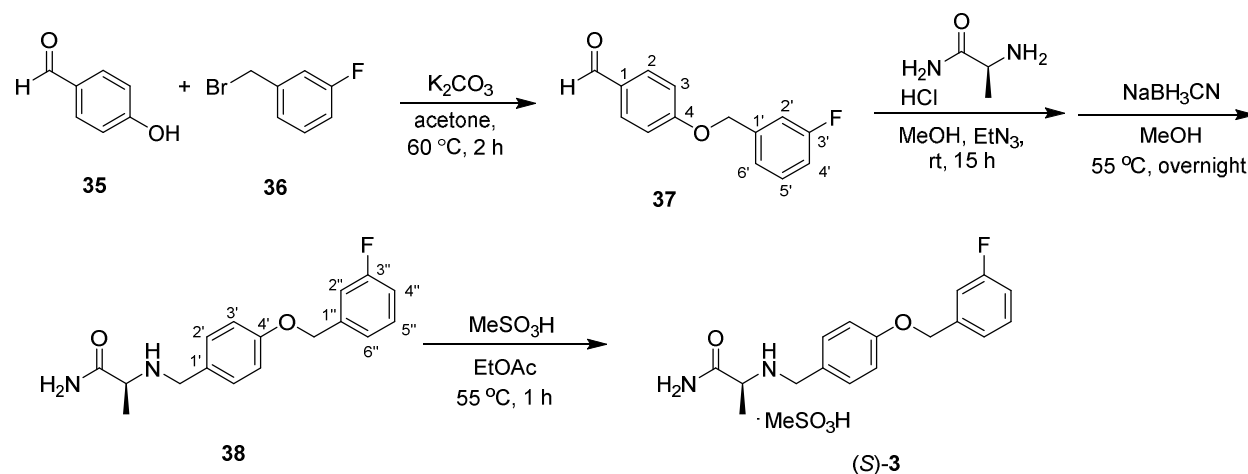

**Scheme S1.** Synthesis of Safinamide ((*S*)-**3**).

**Preparation of 4-((3'-Fluoro)benzyloxy)benzaldehyde (**37**).**<sup>3</sup> To an acetone solution (250 mL) of 4-hydroxybenzaldehyde (**35**) (4.00 g, 32.5 mmol) was added 3-fluorobenzylbromide (**36**) (4.24 mL, 34.1 mmol) and  $K_2CO_3$  (17.96 g, 129.9 mmol), and stirred at reflux (60 °C, 2 h). The reaction mixture was concentrated in vacuo, and then  $H_2O$  (50 mL) and  $CH_2Cl_2$  (50 mL) were added, and the mixture was extracted with  $CH_2Cl_2$  (3 X 50 mL). The combined organic layers were dried ( $Na_2SO_4$ ), and concentrated in vacuo. The residue was purified by flash liquid chromatography on  $SiO_2$  (EtOAc/hexanes 1/9) to yield **37** as a white solid (6.18 g, 83%);  $R_f = 0.50$  (EtOAc/hexanes, 1/5); mp 45–46 °C (lit.<sup>3</sup> mp 40–41 °C);  $^1H$  NMR ( $CDCl_3$ )  $\delta$  5.15 (s,  $OCH_2$ , 2H), 7.00–7.22 (m, 5 ArH), 7.30–7.40 (m, 1 ArH), 7.80–7.90 (m, 2 ArH), 9.90 (s, C(O)H, 1H);  $^{13}C$  NMR ( $CDCl_3$ )  $\delta$  69.5 ( $CH_2O$ ), 114.4 (d,  $J = 22.1$  Hz, ArC), 115.2 (ArC), 115.3 (d,  $J$  (est) = 17.6 Hz, one peak is overlapped with near peak, ArC), 122.9, 130.5, 130.5 (d,  $J = 7.8$  Hz, ArC), 132.2, 138.6 (d,  $J = 7.2$  Hz, ArC), 163.1 (d,  $J = 245.1$  Hz, ArC), 163.5 (ArC), 190.9 (C(O)H).

**Preparation of (*S*)-2-((4'-(3''-fluorobenzoyloxy)benzyl)amino)propanamide (**38**).** To a MeOH solution of L-alanine amide hydrochloride (0.32 g, 2.61 mmol) was added  $EtN_3$  (453  $\mu$ L, 3.26

mmol) and **37** (0.5 g, 2.17 mmol) successively. The reaction solution was allowed to stir at room temperature (2 h) and concentrated in vacuo. The residue was dissolved in EtOAc (100 mL) and washed with H<sub>2</sub>O (3 X 100 mL), and then dried over anhydrous Na<sub>2</sub>SO<sub>4</sub>. The organic layer was concentrated in vacuo and dissolved in MeOH (25 mL). The resulting solution was treated with sodium cyanoborohydride (NaBH<sub>3</sub>CN) (215.5 mg, 3.26 mmol) at 0 °C and allowed to stir at room temperature (16 h). The resulting solution was concentrated in vacuo, dissolved in EtOAc (100 mL), and washed with H<sub>2</sub>O (3 X 100 mL). The organic layer was dried over anhydrous Na<sub>2</sub>SO<sub>4</sub> and concentrated in vacuo. The residue was purified by flash liquid chromatography on SiO<sub>2</sub> (EtOAc) to yield **38** as a white solid (0.39 g, 60%); *R<sub>f</sub>* = 0.10 (EA); mp 123-125 °C; <sup>1</sup>H NMR (DMSO-*d*<sub>6</sub>) δ 1.11 (dd, *J* = 5.6, 1.3 Hz, CH<sub>3</sub>), 2.26 (br s, NH), 2.99 (q, *J* = 6.4 Hz, CH), 3.46 (d, *J* = 13.2 Hz, NHCHH'), 3.60 (d, *J* = 13.2 Hz, NHCHH'), 5.11 (s, OCH<sub>2</sub>), 6.93-7.29 (m, 7 ArH, NH<sub>2</sub>), 7.40-7.47 (m, 1 ArH); <sup>13</sup>C NMR (CDCl<sub>3</sub>) δ 19.7 (CH<sub>3</sub>), 51.9 (NHCH<sub>2</sub>), 57.6 (C(O)CHNH<sub>2</sub>), 69.2 (OCH<sub>2</sub>), 114.2 (d, *J* = 21.9 Hz, ArC), 114.8 (d, *J* = 21.0 Hz, ArC), 114.9 (ArC), 122.7 (d, *J* = 2.8 Hz, ArC), 129.3 (ArC), 130.2 (d, *J* = 8.2 Hz, ArC), 132.3 (ArC), 139.7 (d, *J* = 7.2 Hz, ArC), 163.0 (d, *J* = 244.7 Hz, ArC), 178.4 (C(O)), the remaining signal was not detected and is believed to overlap with nearby peaks

**Preparation of (S)-2-((4'-(3''-Fluorobenzyloxy)benzyl)amino)propanamide, methanesulfonate ((S)-3).** To an EtOAc solution (10 mL) of **38** (0.30 g, 1.0 mmol) was added methanesulfonic acid (78 μL, 1.2 mmol) at 50 °C (1 h). The reaction mixture was cooled down to room temperature and filtered. The solid was washed with EtOAc (100 mL) and dried in vacuo to yield (S)-**3** as a white solid (0.36 g, 90%); mp 213 °C (dec) (lit.<sup>4</sup> mp 210 °C (dec)); [α]<sub>D</sub><sup>26</sup> +12.9° (c 1.0, acetic acid) (lit.<sup>4</sup> [α]<sub>D</sub><sup>25</sup> +12.9° (c 1.1, acetic acid)); <sup>1</sup>H NMR (300 MHz, DMSO-*d*<sub>6</sub>) δ 1.42 (d, *J* = 6.9 Hz, CHCH<sub>3</sub>),

2.31 (s, CH<sub>3</sub>SO<sub>3</sub>H), 3.68–3.75 (m, CHCH<sub>3</sub>), 3.97–4.07 (m, CH<sub>2</sub>NH), 5.17 (s, OCH<sub>2</sub>), 7.06–7.09 (m, 2 ArH), 7.13–7.20 (m, 1 ArH), 7.26–7.30 (m, 2 ArH), 7.39–7.48 (m, 3 ArH), 7.63 (s, C(O)NHH'), 7.90 (s, C(O)NHH'), 8.98 (br s, NH<sub>2</sub>); <sup>13</sup>C NMR (300 MHz, DMSO-*d*<sub>6</sub>) δ 16.4 (CHCH<sub>3</sub>), 48.5 (CH<sub>2</sub>NH), 54.8 (CHCH<sub>3</sub>), 68.8 (OCH<sub>2</sub>), 114.6 (d, *J* = 21.7 Hz, ArC), 115.0 (d, *J* = 20.8 Hz, ArC), 115.4 (ArC), 123.9 (d, *J* = 2.6 Hz, ArC), 124.4 (ArC), 131.0 (d, *J* = 8.3 Hz, ArC), 132.1 (ArC), 140.3 (d, *J* = 7.4 Hz, ArC), 159.0 (ArC), 162.7 (d, *J* = 242.2 Hz, ArC-F), 171.0 (C(O)), the remaining signal was not detected and is believed to overlap with the DMSO-*d*<sub>6</sub> peaks.

### Footnotes and Author Current Address

<sup>a</sup>Center for Neuro-Medicine, Korea Institute of Science and Technology, Seoul, Korea

### References

1. Lebreton, L., Curet, O., Gueddari, S., Mazouz, F., Bernard, S., Burstein, C., and Milcent, R. (1995) Selective and potent monoamine oxidase type B inhibitors: 2-substituted 5-aryltetrazole derivatives. *J. Med. Chem.* *38*, 4786–4792.
2. Lee, H., Gold, A. S., Yang, X.-F., Khanna, R., and Kohn, H. (2013) Benzyloxybenzylammonium chlorides: simple amine salts that display anticonvulsant activity. *Bioorg. & Med. Chem.* *21*, 7655-7662.
3. Salome, C., Salome-Grosjean, E., Park, K. D., Morieux, P., Swendiman, R., DeMarco, E., Stables, J. P., and Kohn, H. 2010 Synthesis and anticonvulsant activities of (*R*)-*N*-(4'-

substituted)benzyl 2-acetamido-3-methoxypropionamides. 2010 *J. Med. Chem.* 53, 1288–1305.

4. Pevarello, P., Bonsignori, A., Dostert, P., Heidempergher, F., Pinciroli, V., Colombo, M., McArthur, R. A., Salvati, P., Post, C., Fariello, R. G., and Varasi, M. 1998 Synthesis and anticonvulsant activity of a new class of 2-[(arylalkyl)amino]alkanamide derivatives. *J. Med. Chem.* 41, 579–590.



**(R)-N-(4'-(4"-Chlorobenzoyloxy)benzyl) 2-Acetamido-3-methoxypropionamide ((R)-8)**

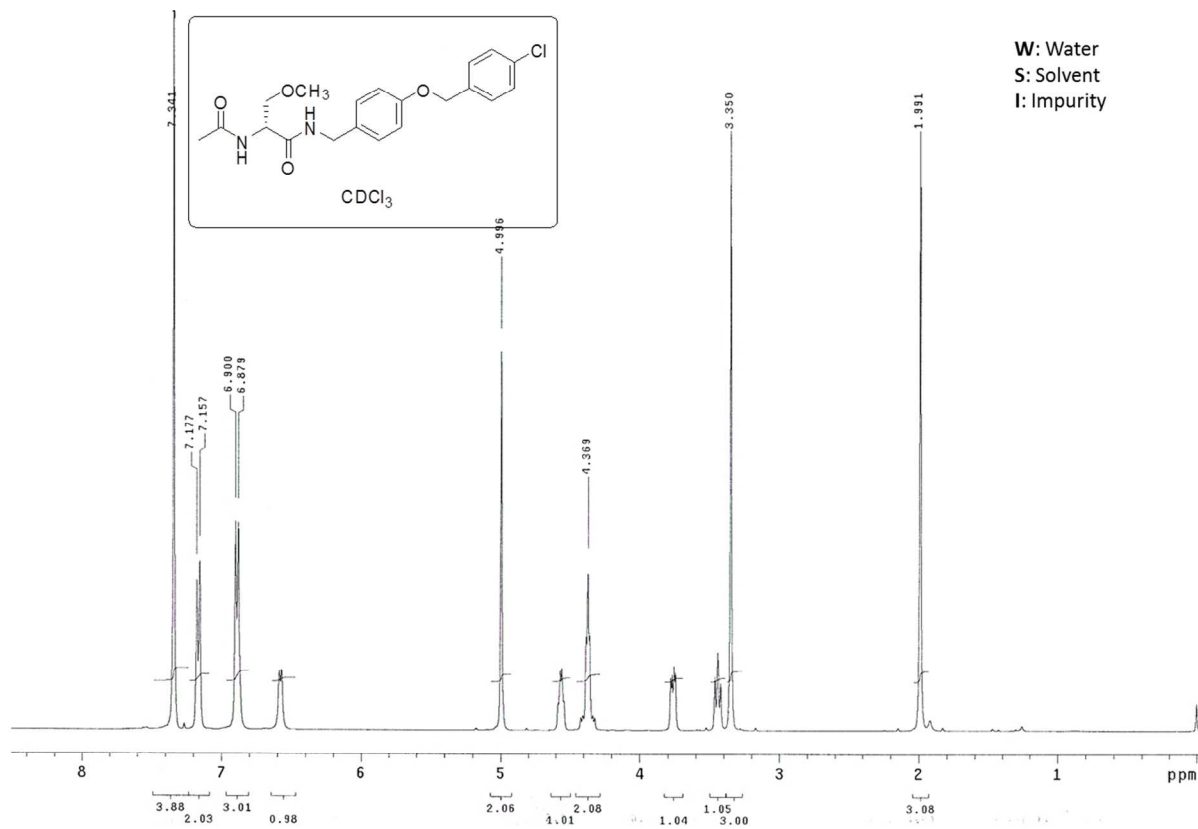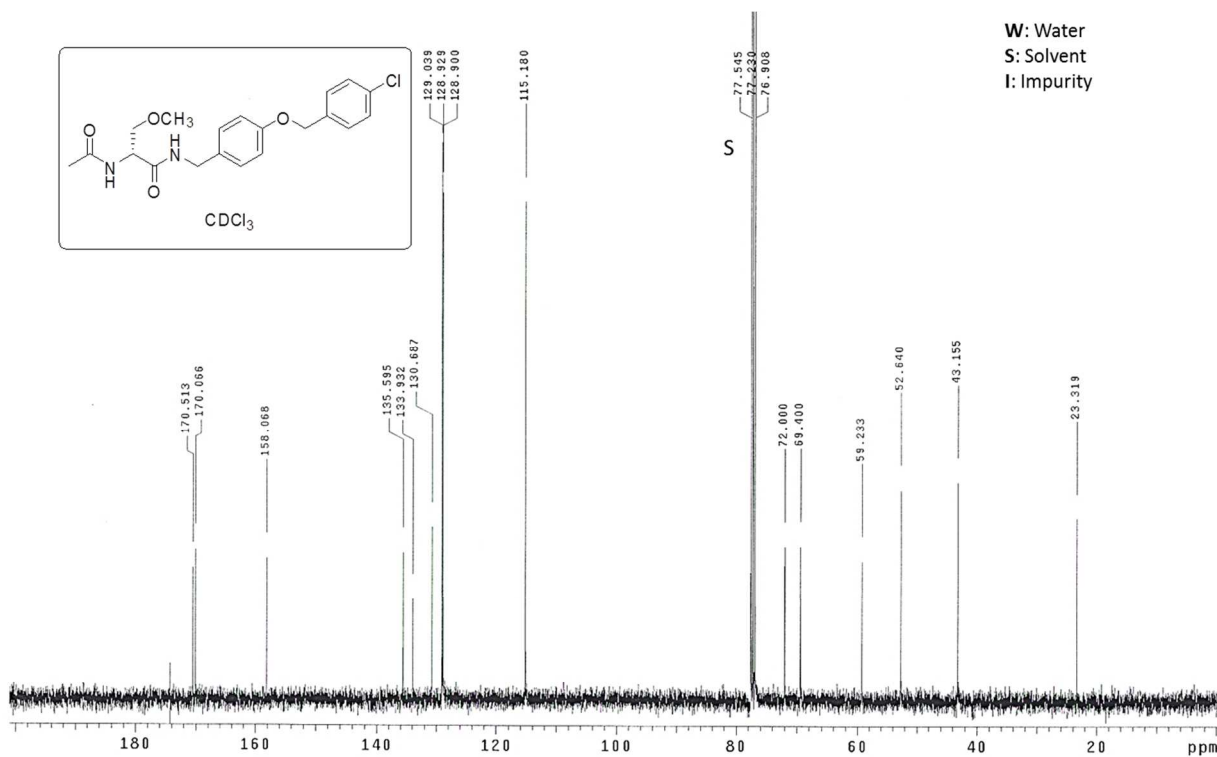

**(R)-N-(4'-(3"-Trifluoromethoxybenzyloxy)benzyl) 2-Acetamido-3-methoxypropionamide ((R)-9)**

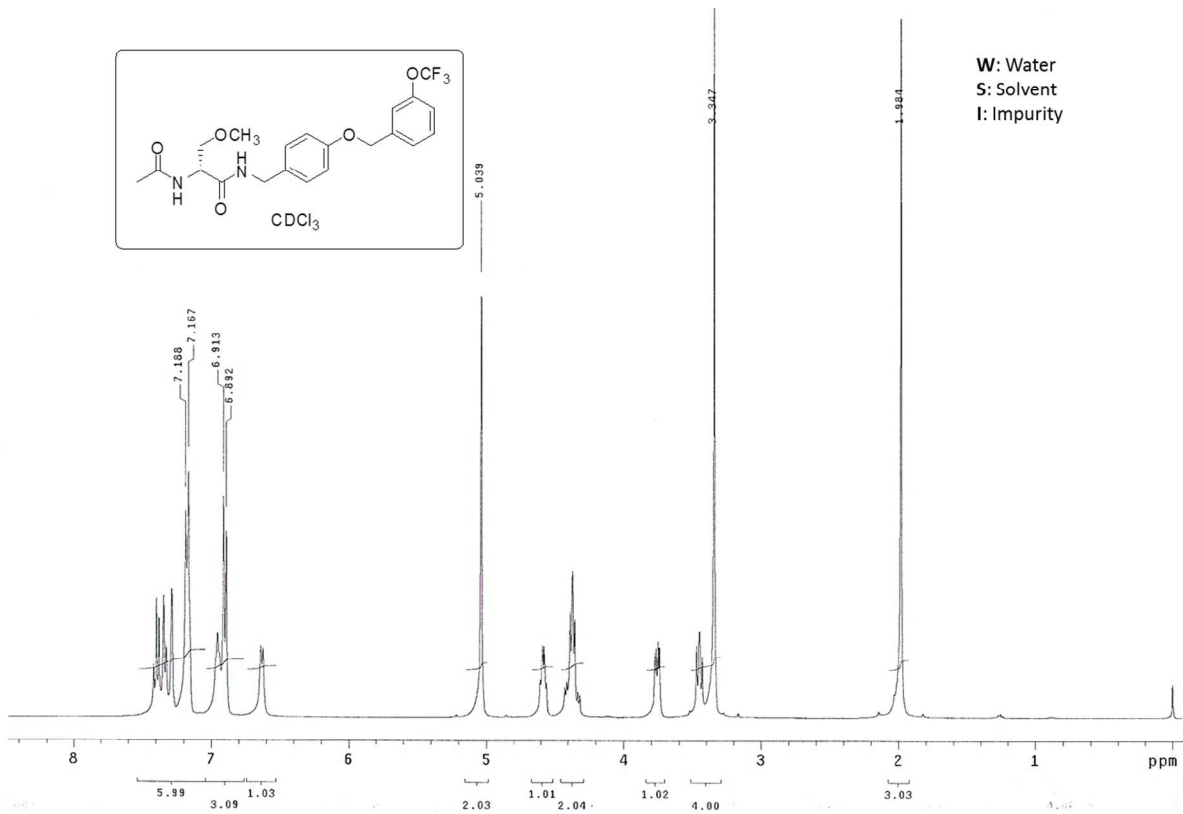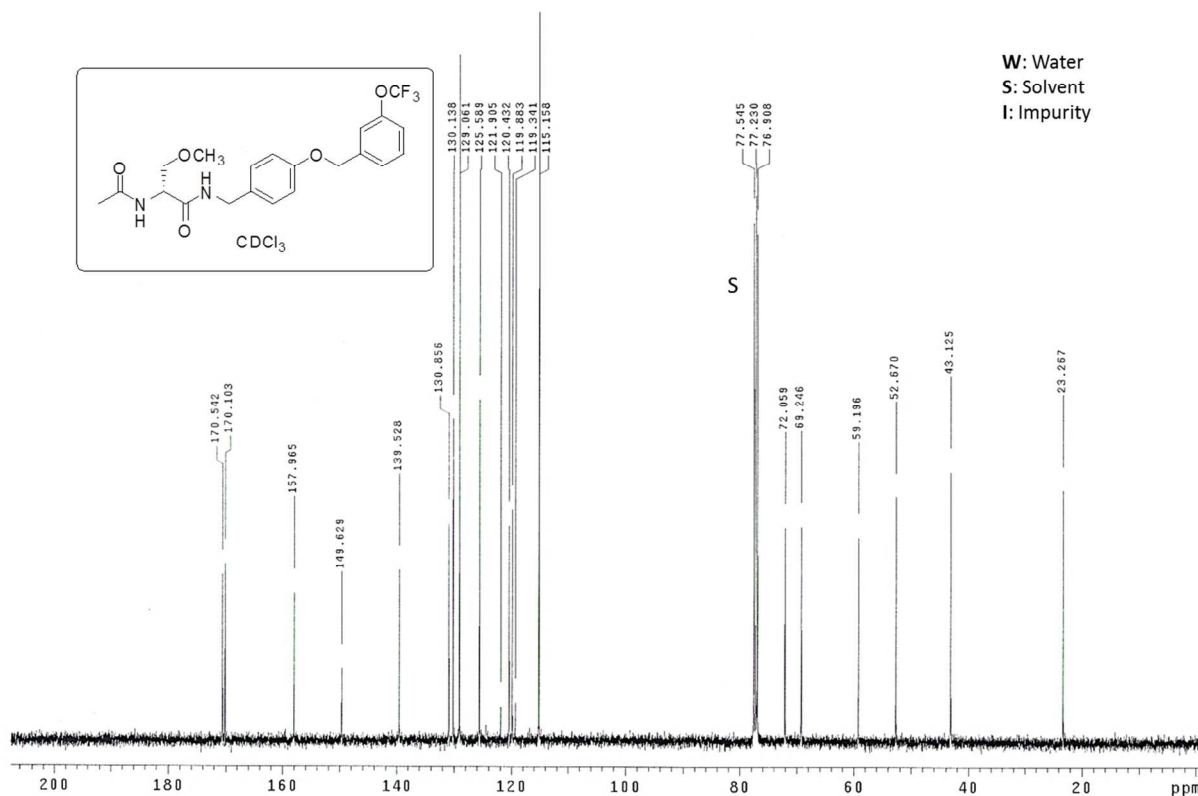



**(R)-N-(4'-(4"-Trifluoromethoxybenzyloxy)benzyl) 2-Acetamido-3-methoxypropionamide ((R)-10)**

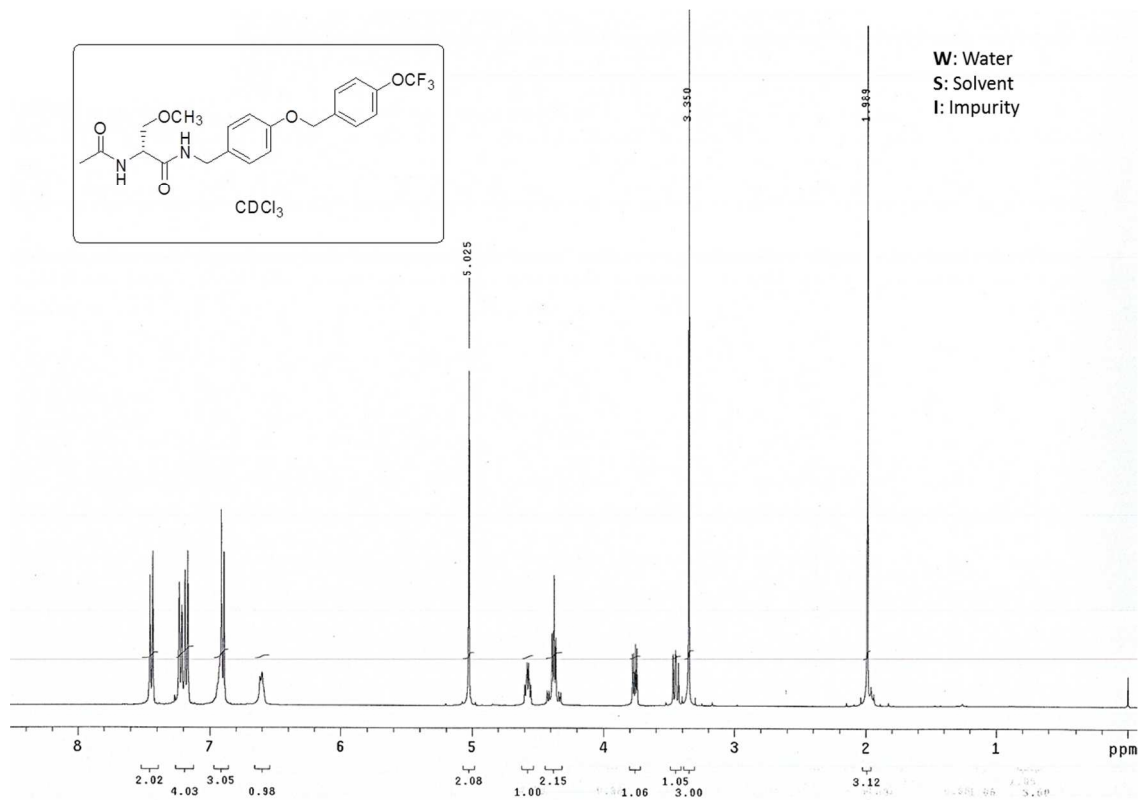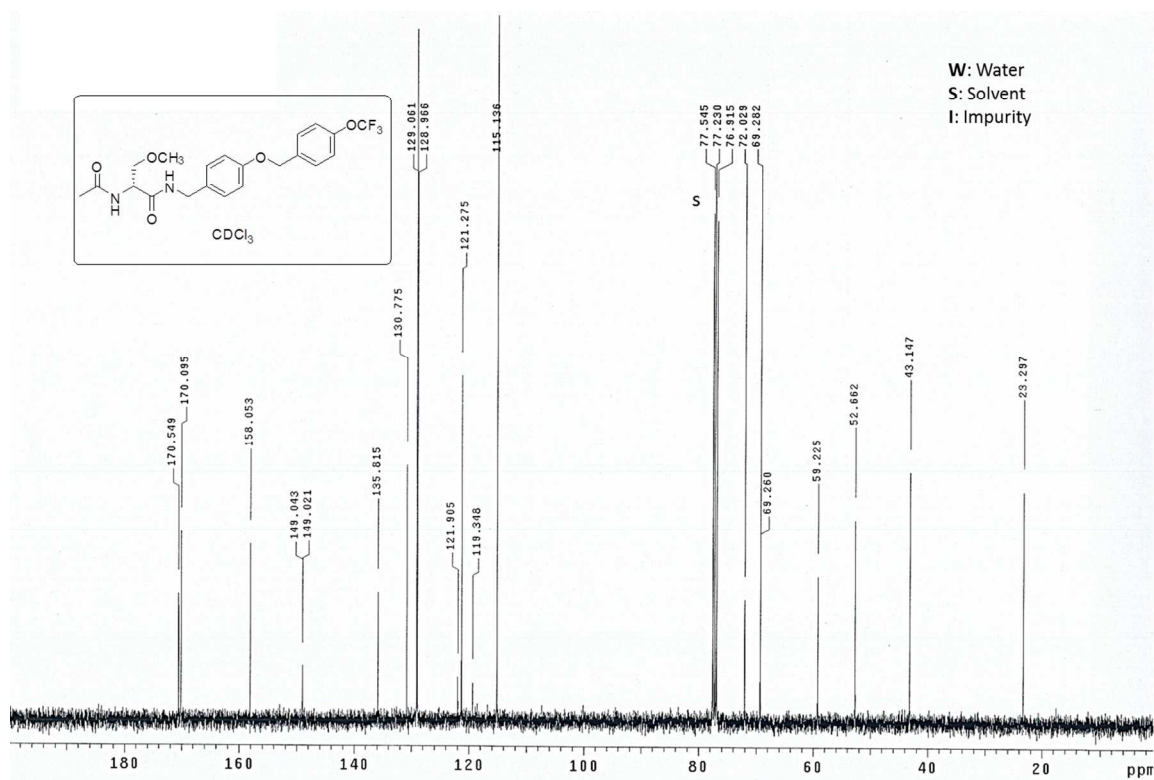

**(S)-2-((4'-(3"-fluorobenzoyl)benzyl)amino)propanamide, methanesulfonate ((S)-3)**

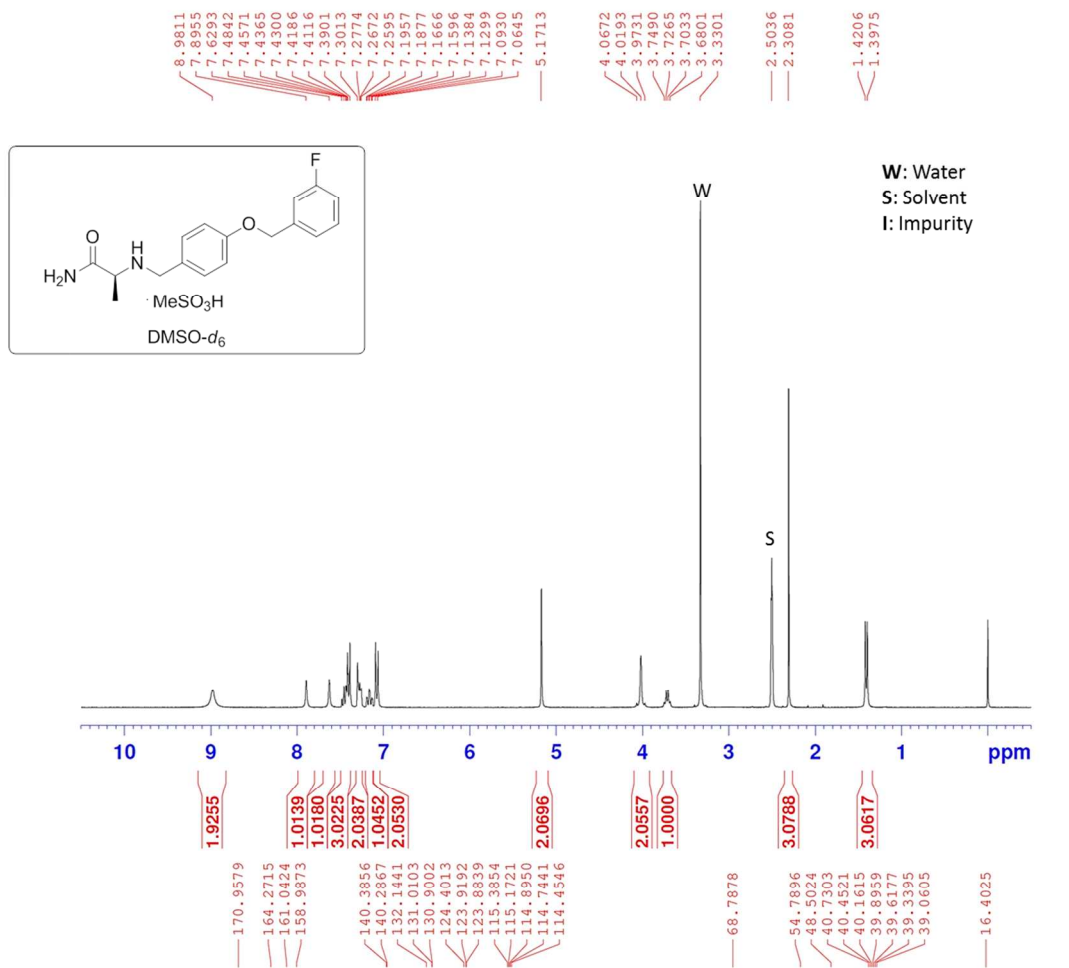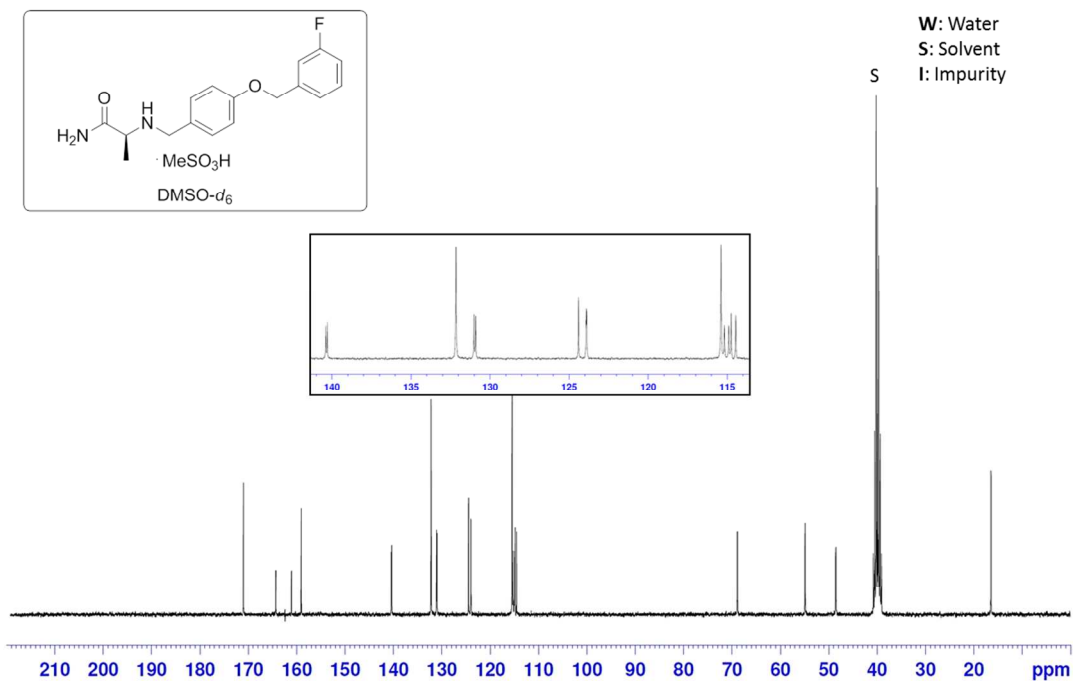

Supplement: cn5002182_si_001.pdf [file cn5002182_si_001.pdf]
